# Supplementary material
Source: Springer Nature journal article supplement (https://www.springermedizin.de/resource/supplementary/12889_2013_6729_MOESM1_ESM.pdf/9498968)

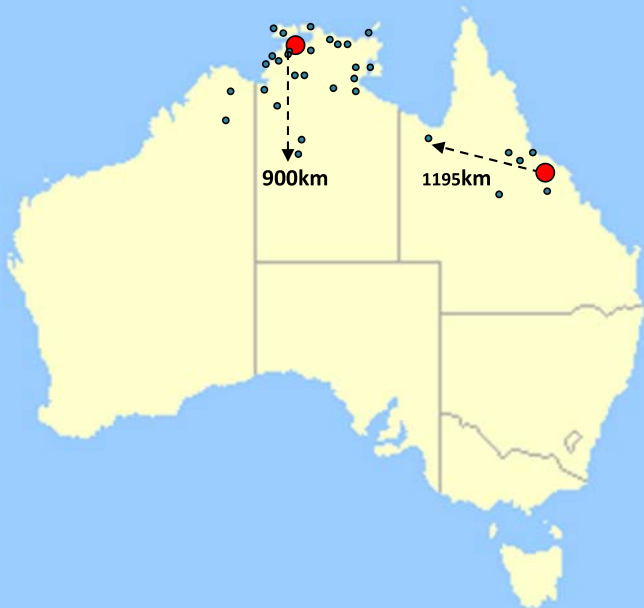

● Recruiting hospitals

● Communities where children came from

Supplement: MOESM1 [file 9498968]
